# Supplementary material
Source: PubMed Central journal article supplement (PMC2903375)
Supplement: supp_M110.121749_jbc.M110.121749-1.pdf [file supp_M110.121749_jbc.M110.121749-1.pdf]

## On-line Figure Legends

Fig. 1. *Assessment of cardiomyocyte preparation and expression of renin-angiotensin components in cardiomyocytes.* **A**, The purity of isolated cardiomyocytes was assessed by Western blot, with aliquots (40  $\mu\text{g}$  each) of proteins isolated from cardiomyocytes, fibroblasts, smooth muscle cells, endothelial cells and whole-brain. Proteins were separated by SDS-PAGE and transferred onto PVDF. After blocking, membranes were incubated with antisera specific for Van Willebrand's Factor (VWF), neuron-specific enolase (NSE), discoidin domain receptor 2 (DDR2),  $\alpha$ -smooth muscle actin ( $\alpha$ SMA), myosin heavy chain (MyHC) and GAPDH. Immunoreactive bands were visualized by ECL (examples of Western blots are illustrated, we performed 4 separate experiments/antibody/fraction) **B**, The expression of renin-angiotensin components were confirmed with RNA isolated from the cytosol of cardiac myocytes, by qRT-PCR with primers for angiotensinogen (AGT), angiotensin converting enzyme (ACE), cathepsin and renin, data are presented as mRNA expression relative to an average of three housekeeping genes (N=8/primer)

Fig. 2. *Immunoreactivity of angiotensin II receptor subtypes 1 and 2 in purified cardiac nuclei.* **A**, Rat hearts were fractionated into four fractions: total extract (A), supernatant (B), crude nuclear (C) and enriched nuclear (D) fractions. Aliquots (30  $\mu\text{g}$ ) of each fraction were separated by SDS-PAGE and transferred onto PVDF. After blocking, membranes were incubated with antisera specific for Calpactin I, GRP78, Nup62, GM130, AT1 or AT2 (examples of Western blots are illustrated, N=6/antibody/per fraction). Immunoreactive bands were visualized by ECL. **B**, Mean $\pm$ SEM expression levels for GRP78, GM130, Nup62, AT1, AT2 normalized to Calpactin I. \*P<0.05, \*\*P<0.01 vs. respective fraction in B. **C**, Representative images of a purified nuclear preparation. **Left**: DNA-staining with Hoechst 33342; **Right**: Corresponding phase-contrast image. **D**, Mean $\pm$ SEM DNA content ( $\mu\text{g}/\text{ml}$ ) of cytoplasmic or nuclear fractions (N=10/group). \*\*\*P<0.001 vs. cytoplasmic.

Fig. 3. *Endocytosis and intracellular trafficking of Ang-II.* **A**, FITC-Ang-II (1 nM) was applied extracellularly to the bathing medium. Images are shown immediately after Ang-II application (0 min) and then 30 and 60 min later. Merged images are superimposed fluorescent images. **B**, cells were preincubated with valsartan (10  $\mu$ M, for 25 min) prior to administration of Ang-II. Hoechst 33342 was used as a nuclear marker. Z-stacks were acquired every 5 min using a Zeiss LSM-510 confocal microscope. (N=6/group)

Fig. 4. *AT1R and AT2R in nuclear membranes regulate transcription initiation.* **A**, De novo RNA synthesis. Isolated nuclear preparations were stimulated with Ang-II, L 162,313 (a non-peptide AT1R-selective agonist), CGP 42112A (an AT2R-selective agonist), candesartan plus Ang-II, or PD123177 plus Ang-II (all at 10- $\mu$ M), as indicated. Following the addition of antagonists candesartan (Cand) and PD123177, nuclei were preincubated for 30 min prior to the addition of Ang-II. \*\*\*P<0.001 vs. control; ++P<0.01 vs. Ang-II. **B**, Nuclei were treated with PTX 5  $\mu$ g/ml for 2 hours and then stimulated with Ang-II. Data represent mean  $\pm$  SEM of at least five separate experiments performed in triplicate and normalized to control. \*\*\*P<0.001 vs. control; N.S. = non-significant vs. control. **C**, representative 2% agarose gel electrophoresis of RNA extracted from purified nuclei stained with ethidium bromide (GTP and CTP not omitted) under the following conditions: non-stimulated (lane 1); stimulated with Ang-II (10  $\mu$ M, lane 2); stimulated with Ang-II in the presence of valsartan (10  $\mu$ M, lane 3); stimulated with Ang-II in the presence of PD123177 (10  $\mu$ M, lane 4). 1  $\mu$ g of each sample was loaded. Bottom panel shows mean $\pm$ SEM results as arbitrary optical density (O.D.) units from 6 different experiments/condition. \*\*P<0.01 vs. control, ++P<0.01 vs. Ang-II.

Fig. 5. *Regulation of nuclear NF $\kappa$ B mRNA expression by nuclear ATRs.* Isolated nuclei were treated for 2 hours with Ang-II at different concentrations. NF $\kappa$ B mRNA was quantified by qPCR. **A**, Data are presented as NF $\kappa$ B mRNA expression relative to an average of three housekeeping genes (N=6/concentration/group). \*\*\*P<0.001 vs. intact cells, N.S. = non-significant. **B**, Valsartan (10  $\mu$ M) or

PD123177 (10  $\mu$ M) significantly reduced the Ang-II (10  $\mu$ M) induced NF $\kappa$ B activity, while pretreatment of nuclei with both AT1 and AT2 antagonists completely abolished the NF $\kappa$ B gene expression-response. Results are expressed as mean $\pm$ SEM \*P<0.05 vs. control, <sup>+</sup>P<0.01 vs. Ang-II, <sup>#</sup>P<0.01 vs. valsartan, N.S: non significant vs. control

Fig. 6. *Vehicle control for calcium transients.* Typical recordings of intracellular Ca<sup>2+</sup> are shown, with recordings from isolated nuclei preparations shown in insets, after administration of DMSO

Fig. 7. *Coupling of ATRs to Ca<sup>2+</sup> entry in nuclear enriched preparations.* FURA-2/AM-loaded freshly isolated cardiac nuclei were seeded onto glass slides and nuclear Ca<sup>2+</sup> concentration [Ca<sup>2+</sup>] was measured with an IonOptix microspectrofluorimeter ( $\lambda_{ex}$  = 340 and 380 nm;  $\lambda_{em}$  = 509 nm). Typical recordings of intracellular Ca<sup>2+</sup> are shown, with recordings from each preparation studied shown in insets, after administration of: **A**, Ang-II (10  $\mu$ M); **B**, L-162,313 (10  $\mu$ M); **C**, candesartan (10  $\mu$ M) plus Ang-II (10  $\mu$ M); **D**, CGP 42112A (10  $\mu$ M); **E**, PD123177 (10  $\mu$ M) plus Ang-II (10  $\mu$ M). **F**, Summary of mean $\pm$ SEM [Ca<sup>2+</sup>] transient amplitudes (N=6/group/condition) \*P<0.05 vs. control, N.S. = non-significant vs. control; arrows in **A-E** indicate the time of drug application.

Fig. 8. *IP<sub>3</sub>-dependent Ca<sup>2+</sup> signals from isolated nuclei.* Isolated nuclei were exposed to **A**, IP<sub>3</sub> (10  $\mu$ M). **B**, the IP<sub>3</sub>R blocker 2-APB (10  $\mu$ M) followed by exposure to IP<sub>3</sub>. **C**, the IP<sub>3</sub>R blocker 2-APB (10  $\mu$ M) followed by exposure to Ang-II (10  $\mu$ M). **D**, summary of [Ca<sup>2+</sup>] transient amplitudes, mean $\pm$ SEM (N=5/group/condition) \*\*\*P<0.001; arrows indicate the time of drug application in **A-C**.

Fig. 9. *Role of IP<sub>3</sub>R-signaling for AT1R-mediated transcription initiation.* Isolated nuclei were pre-treated with various concentrations of 2-APB for 30 minutes and incubated with: **A**, Ang-II **B**, L-162,313 or **C**, CGP42112A (all at 10  $\mu$ M) and de novo RNA synthesis was measured by <sup>32</sup>P-UTP incorporation.

\*\*\*P<0.001 or \*\*P<0.01 vs. agonist alone (Ang-II or L-162,313); ##P<0.01 or #P<0.05 vs. DMSO or 2-APB alone (15  $\mu$ M); N.S: non-significant.

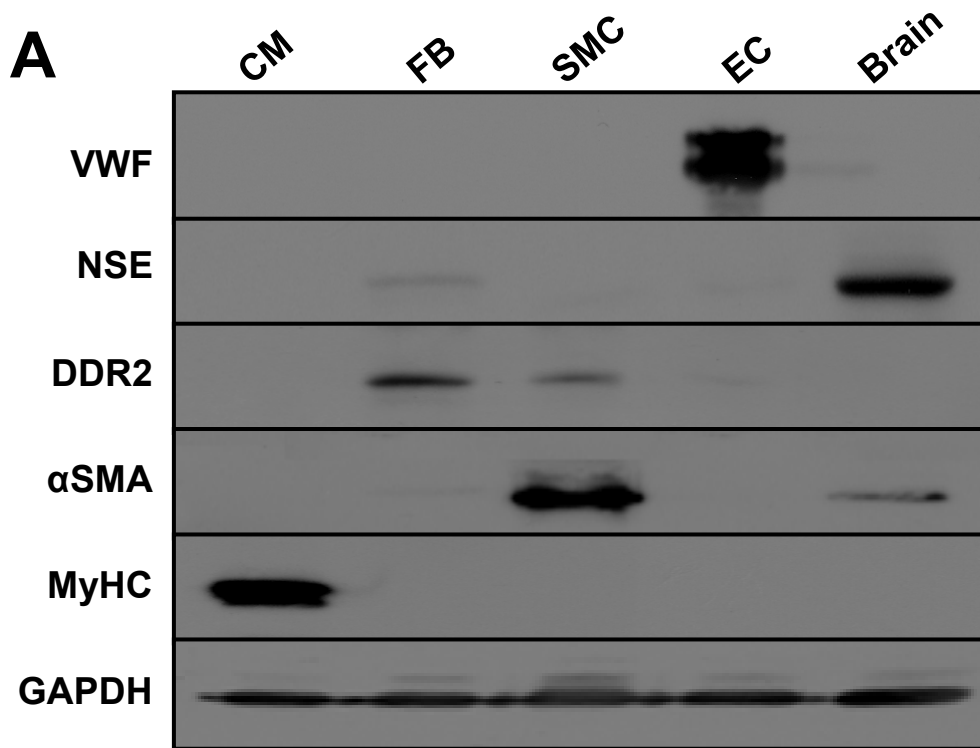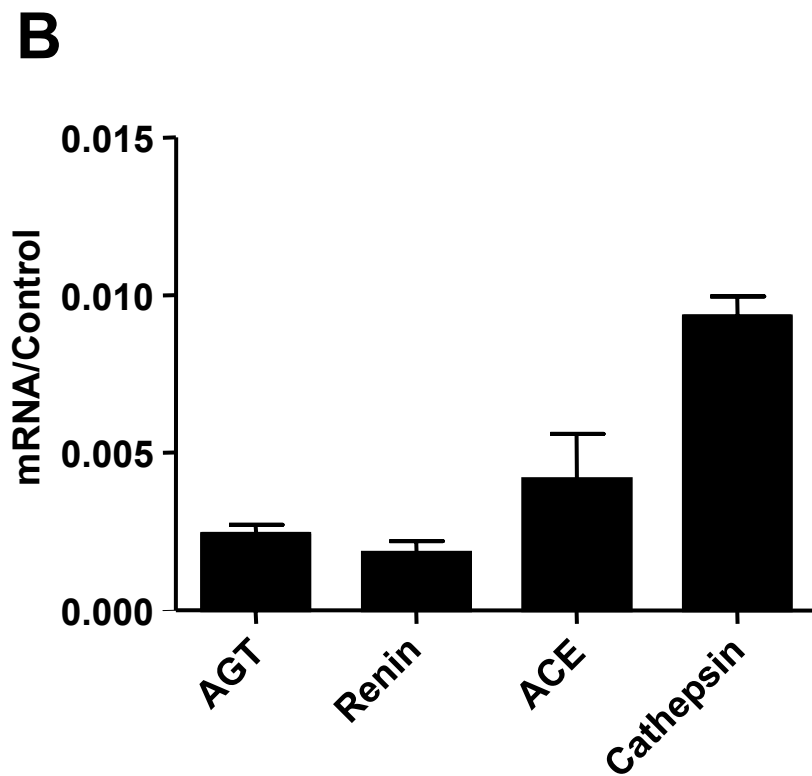

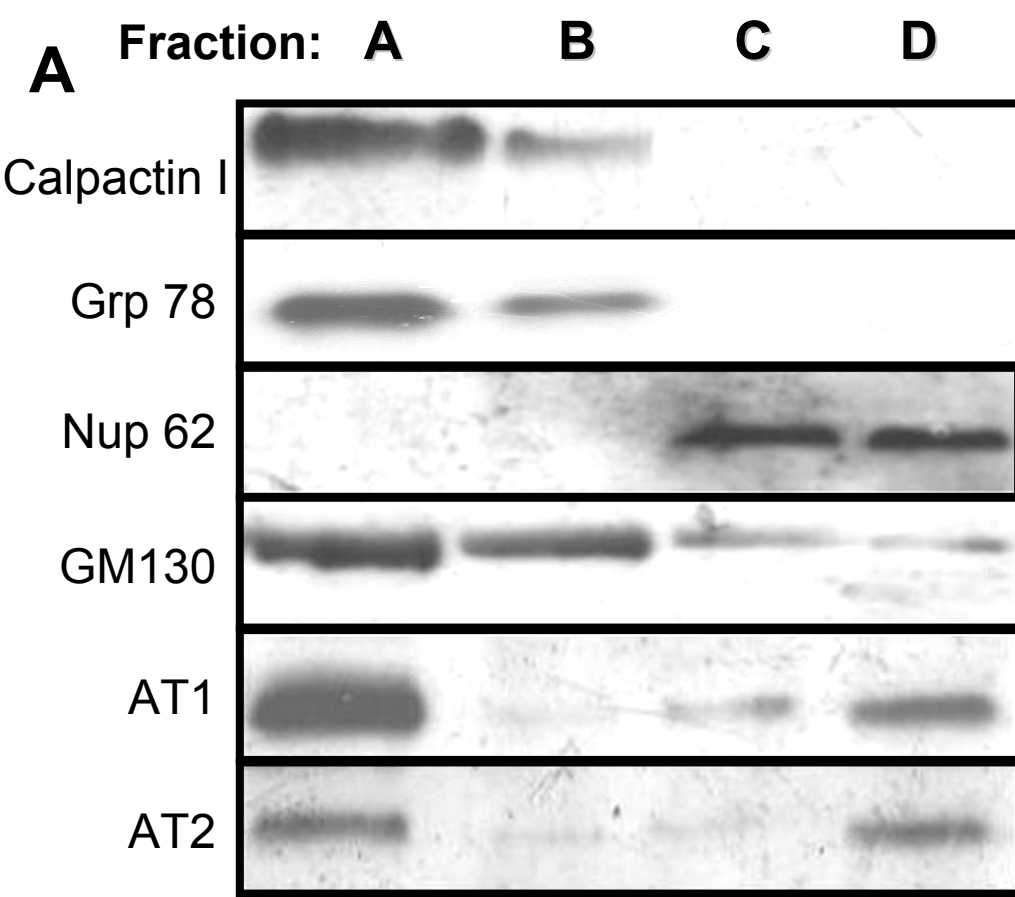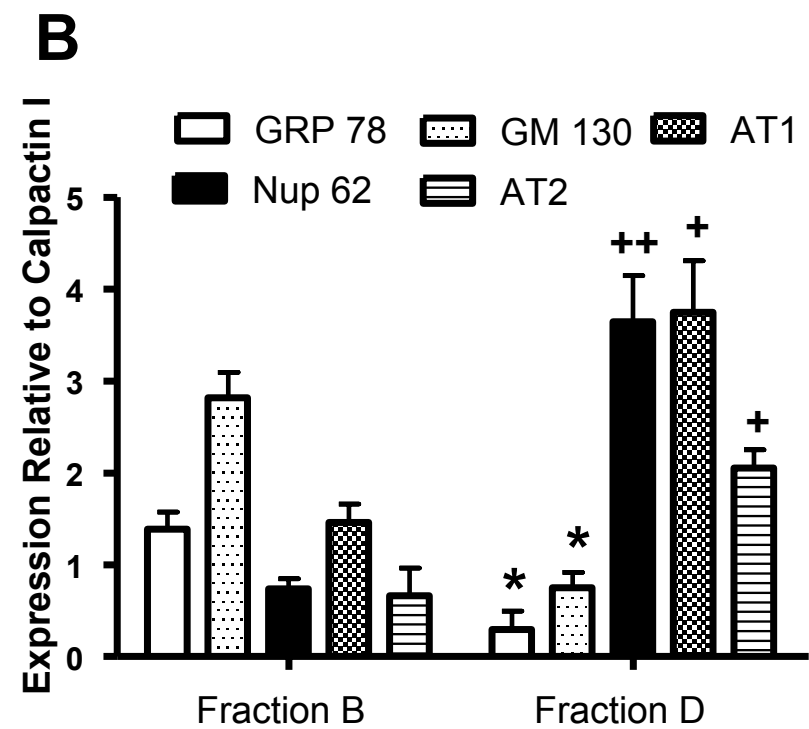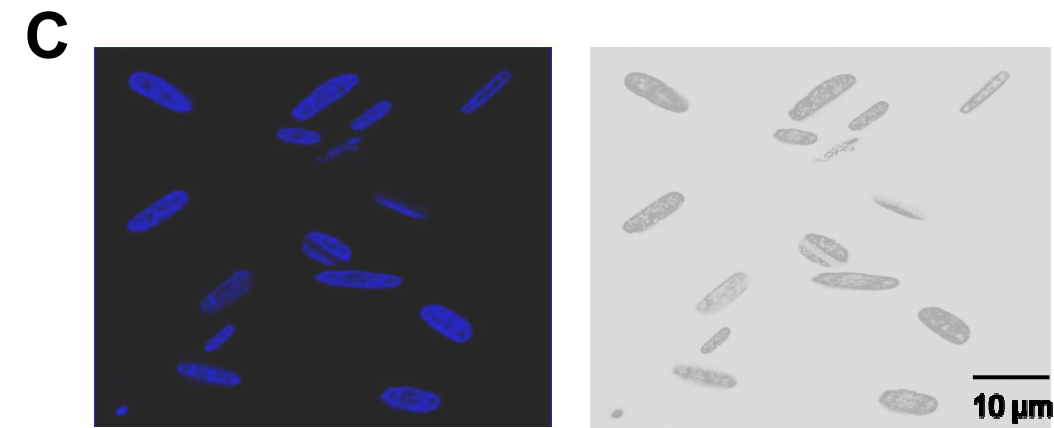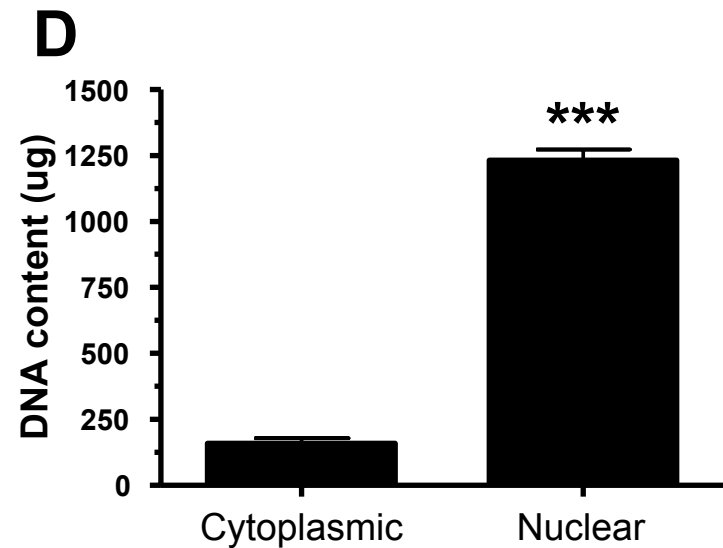

**A**

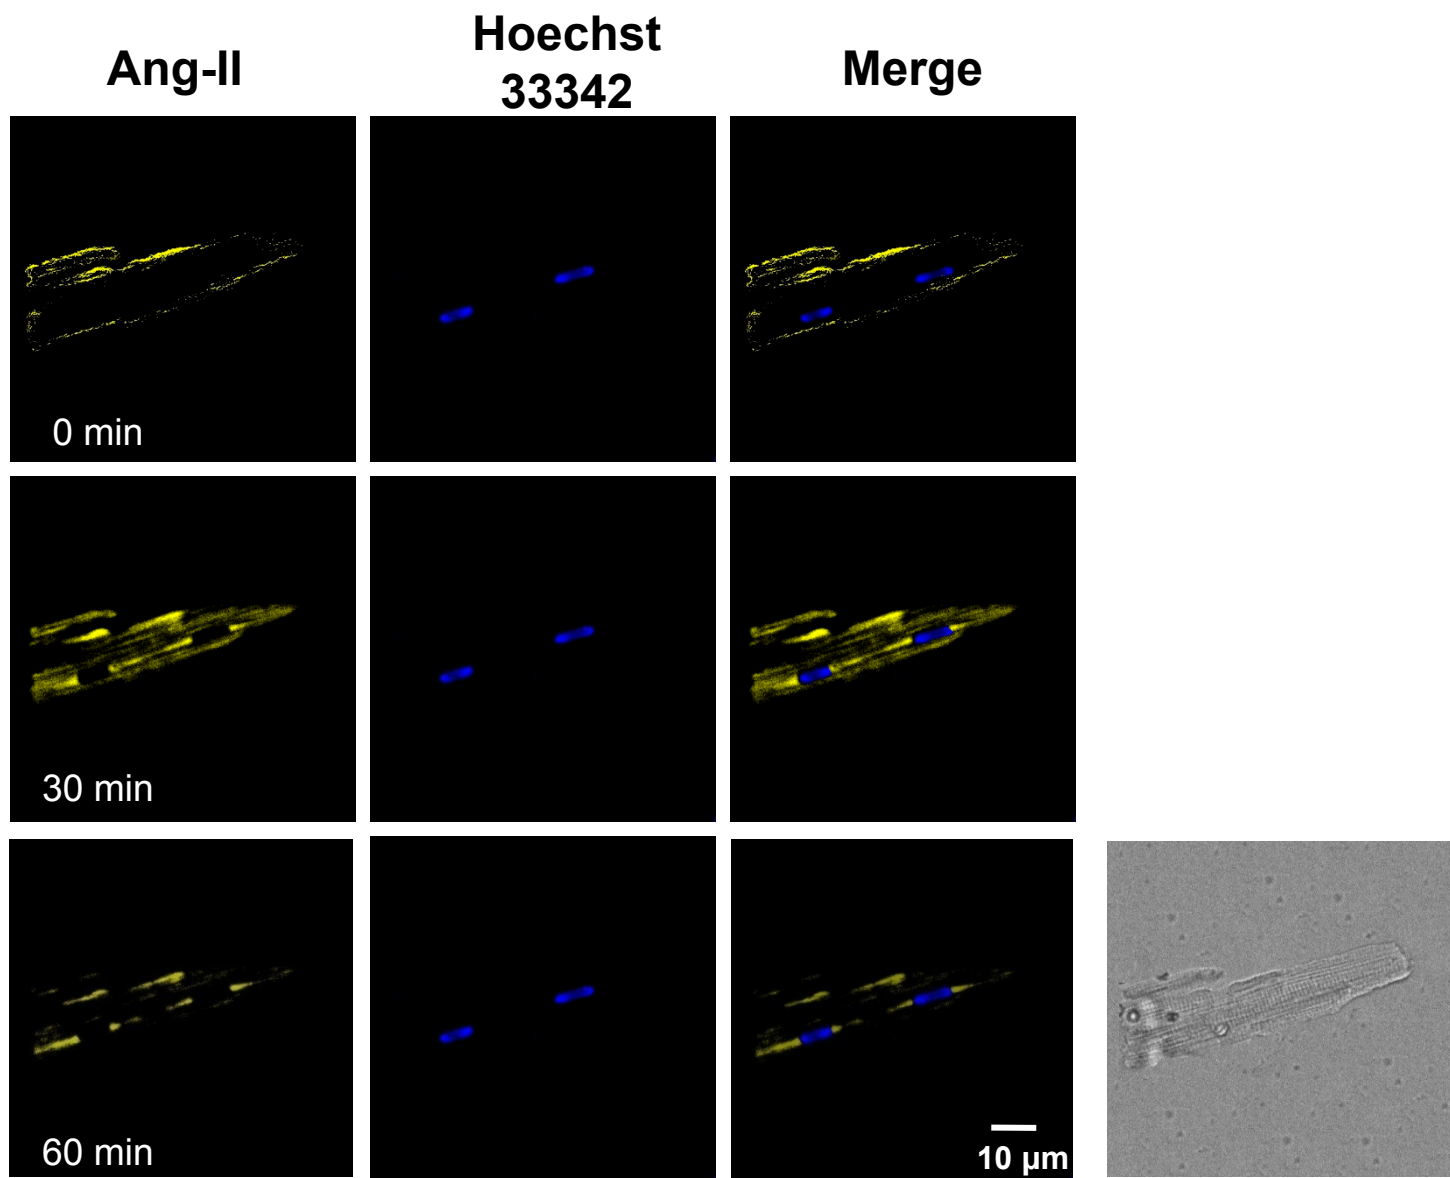

**On-line Figure 3A**

**B**

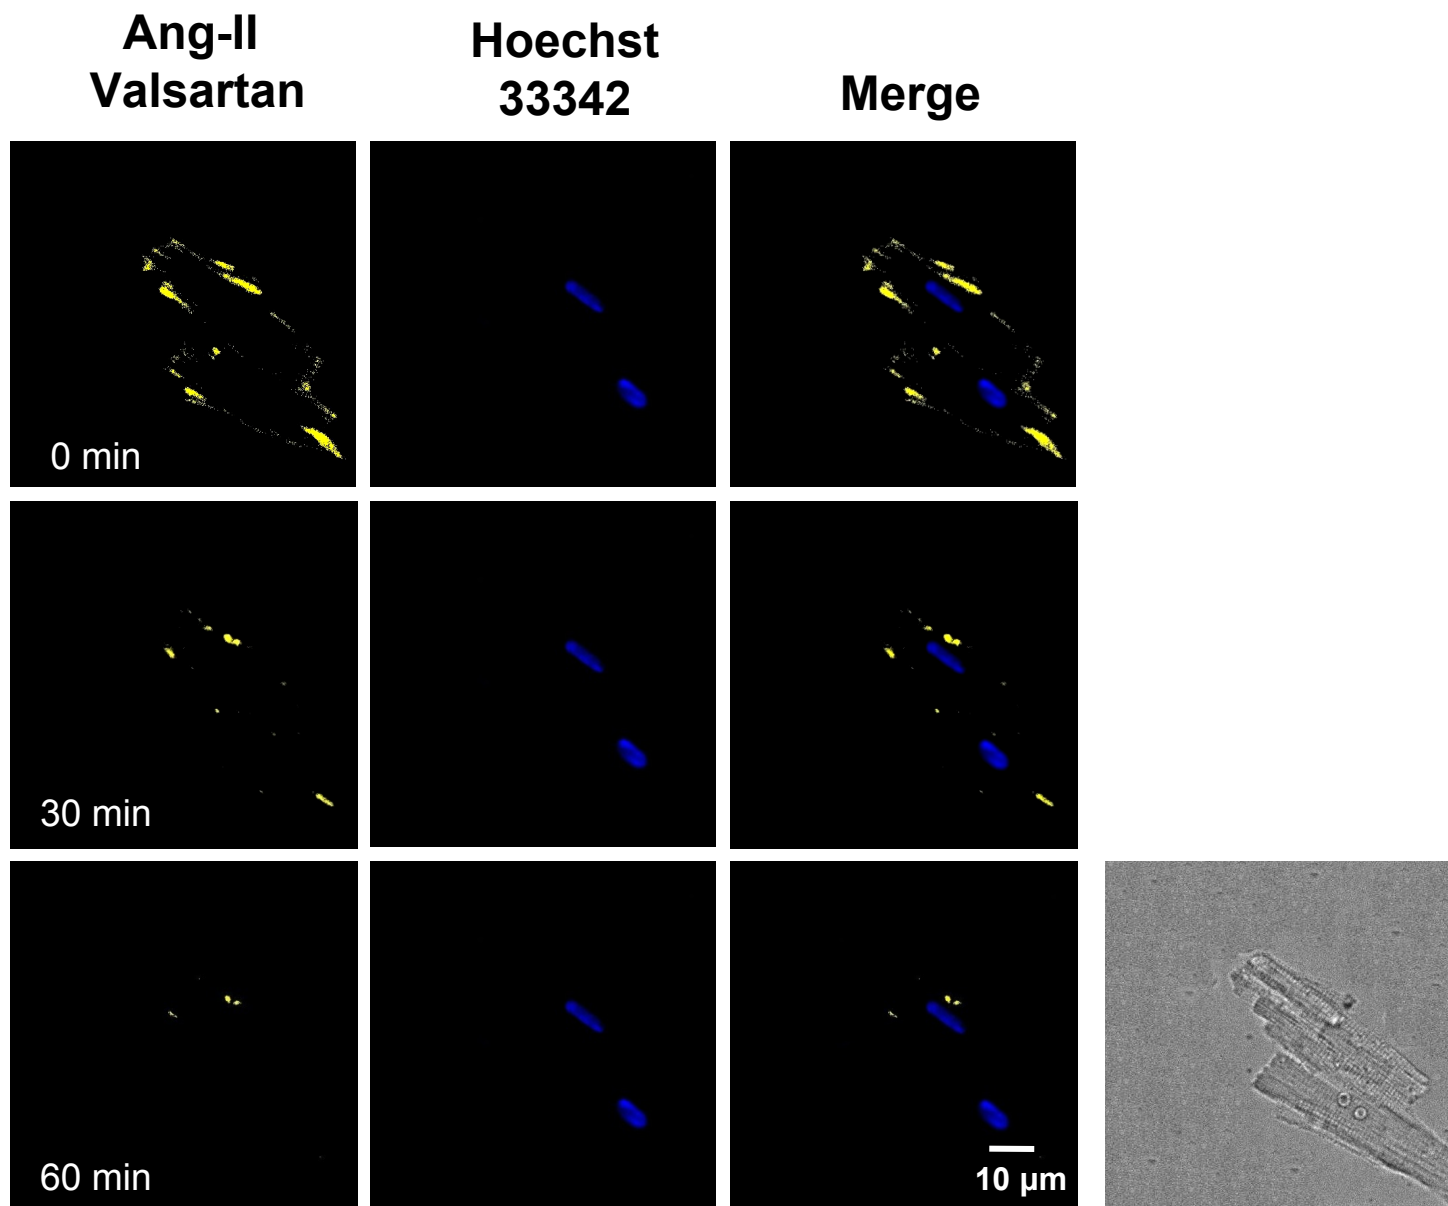

**On-line Figure 3B**



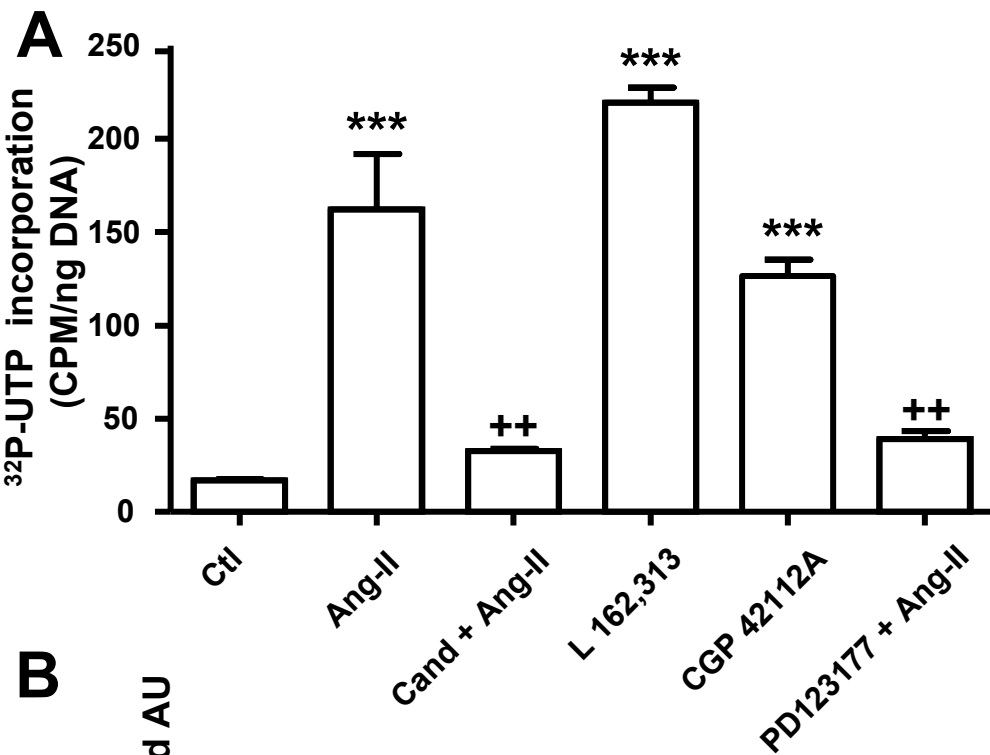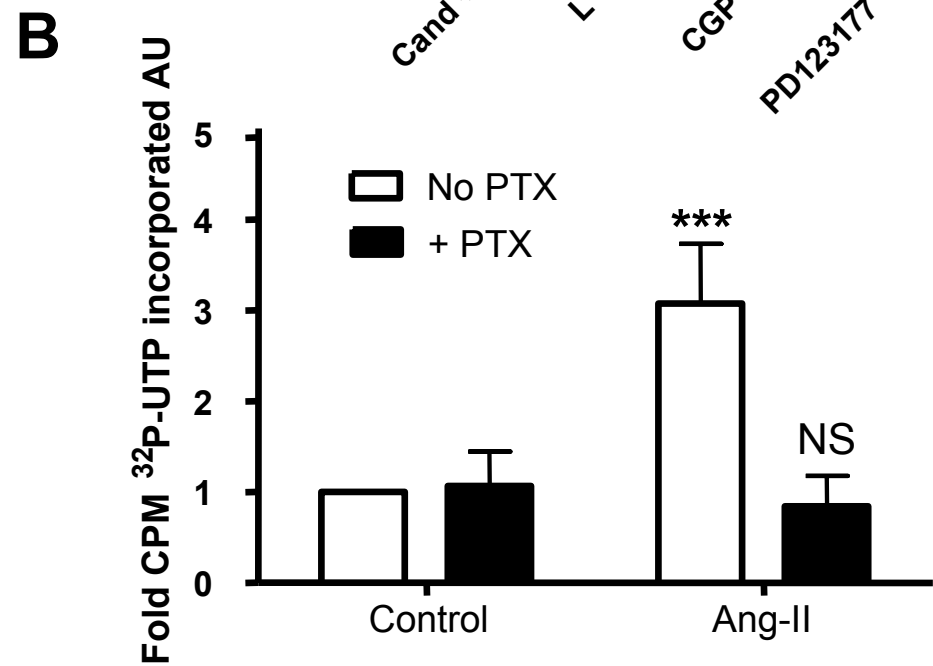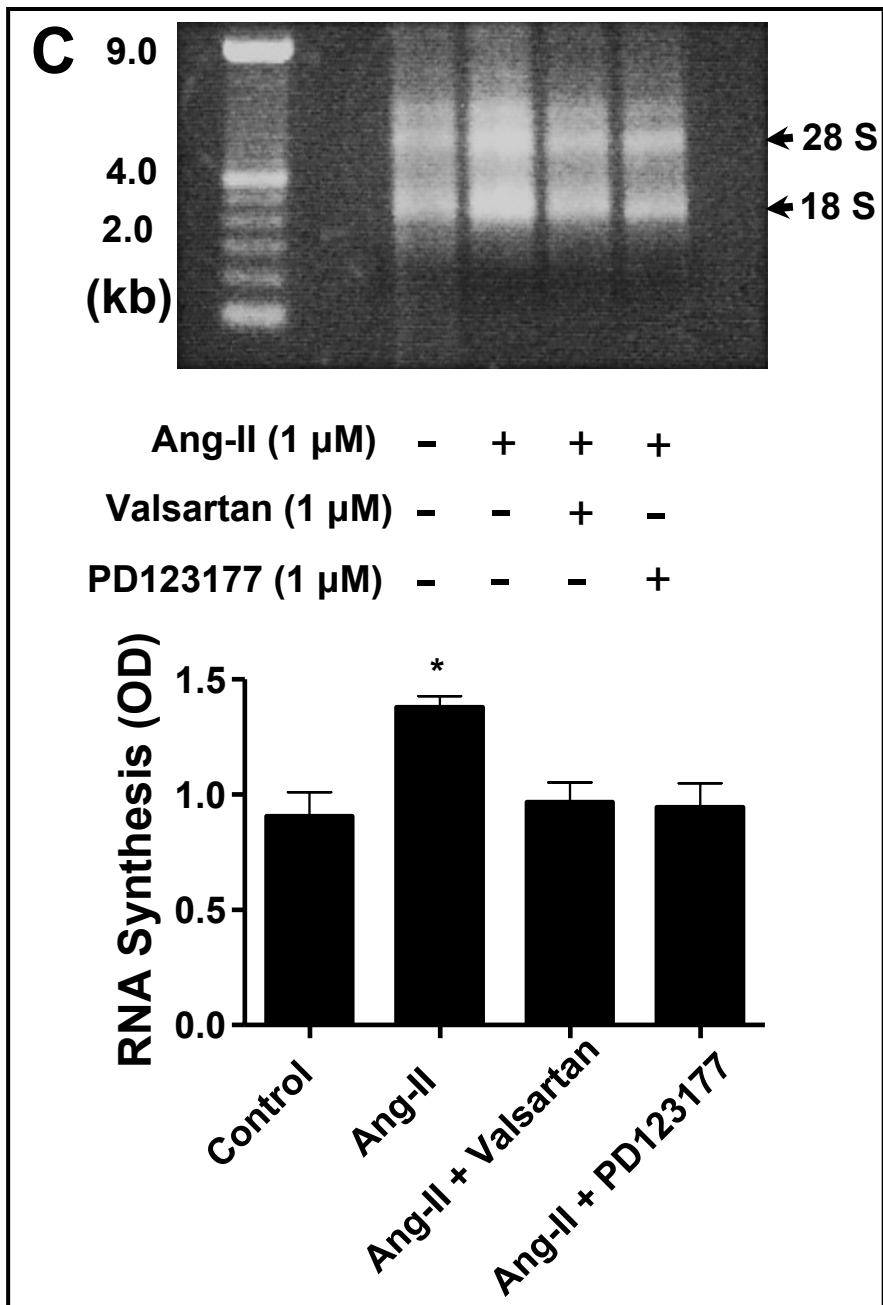

**A**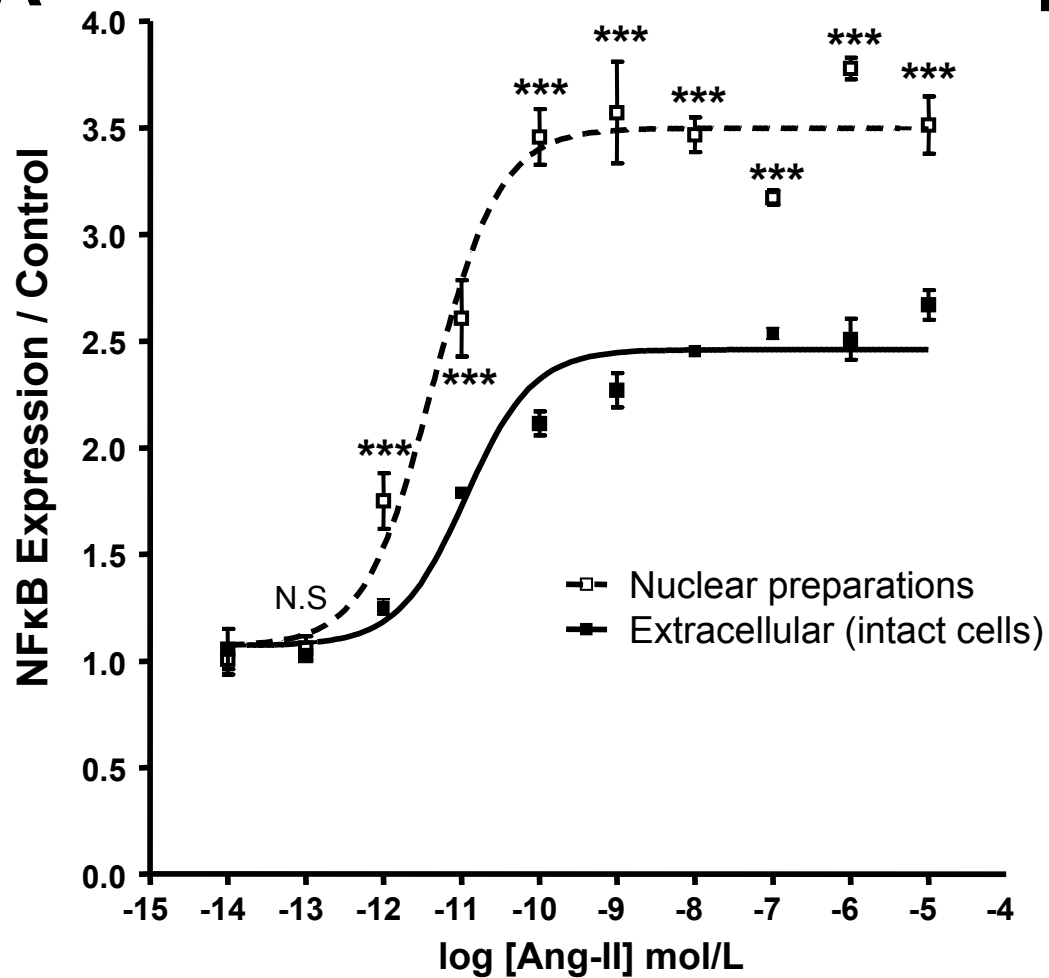**B**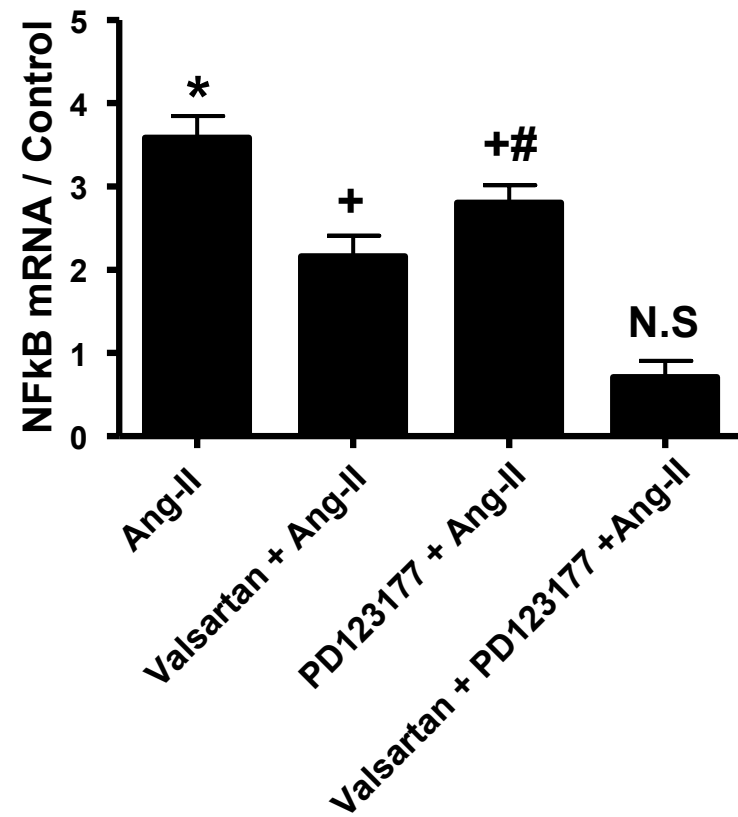

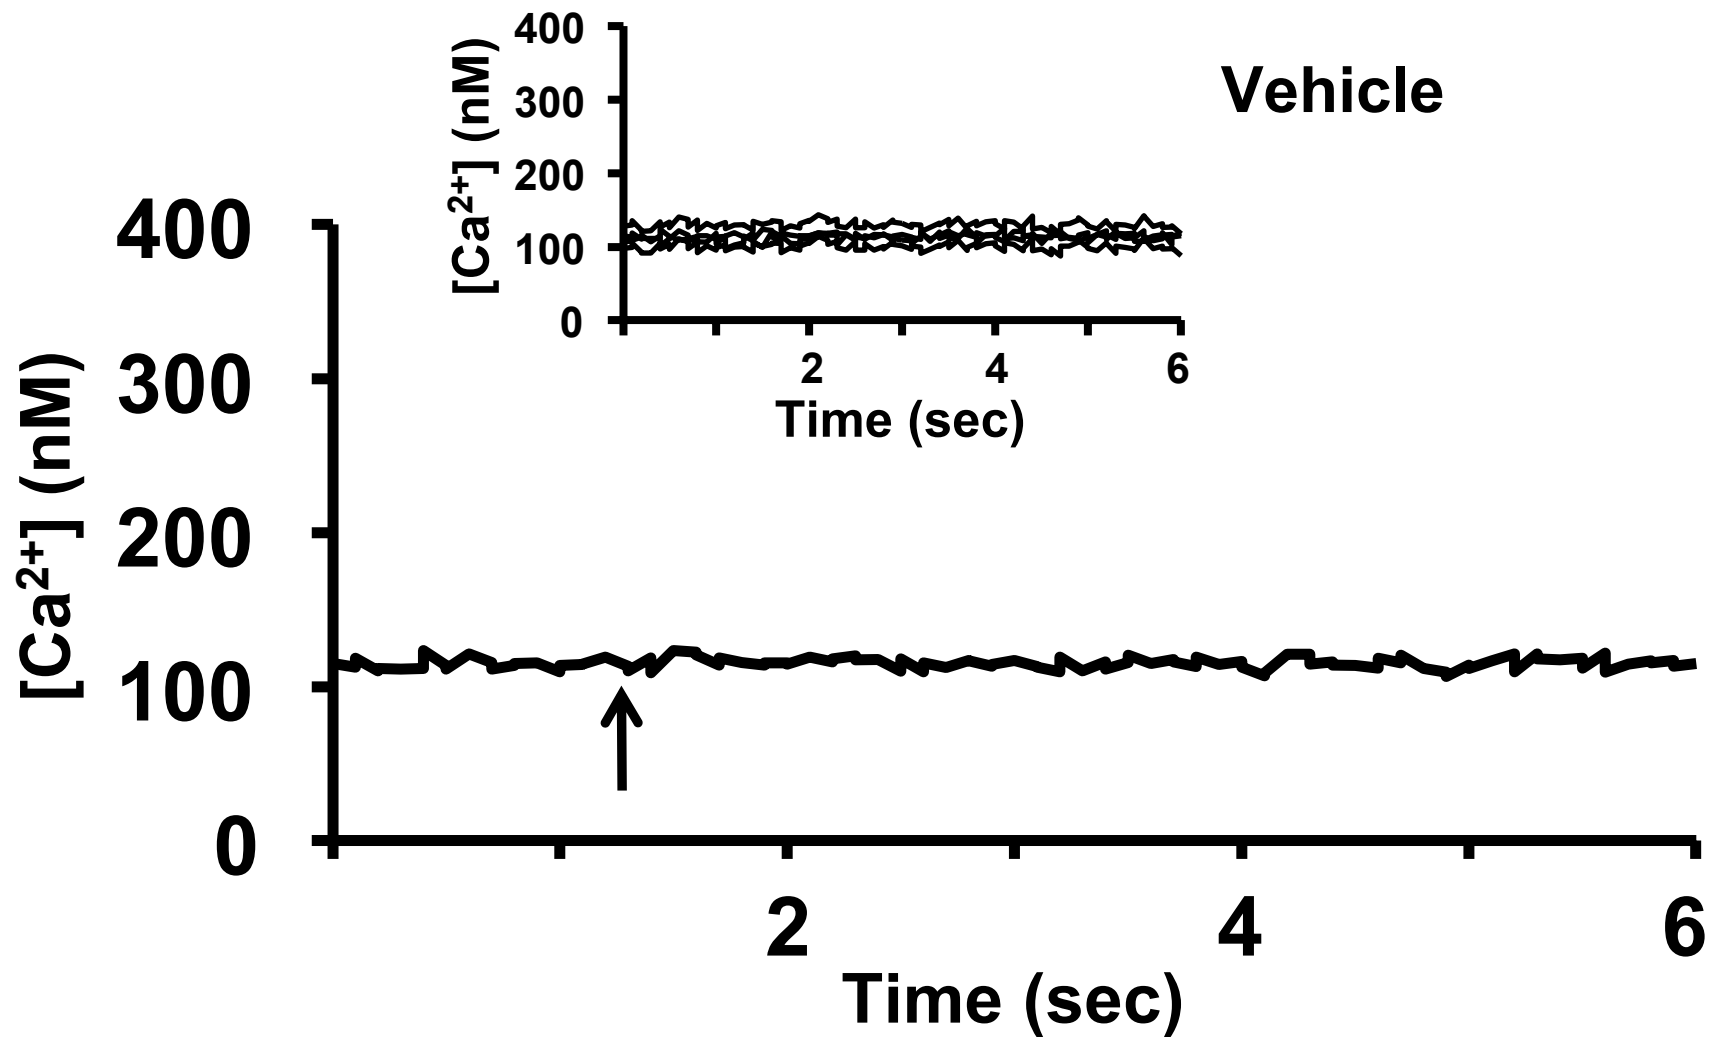

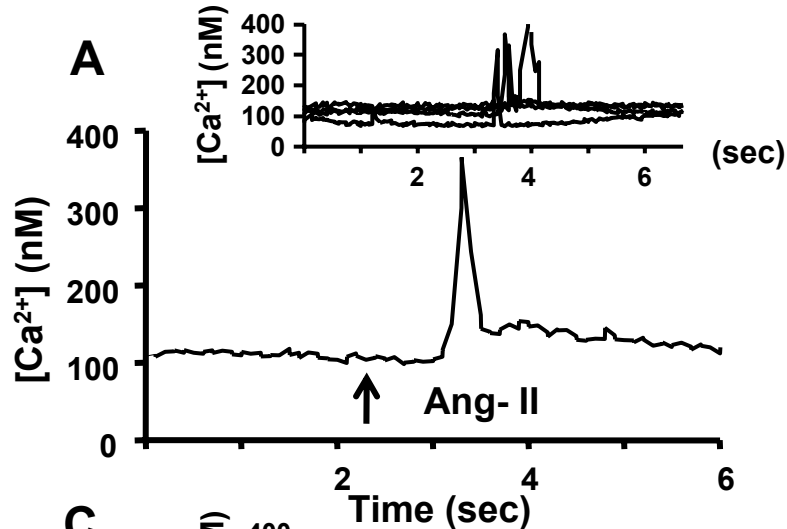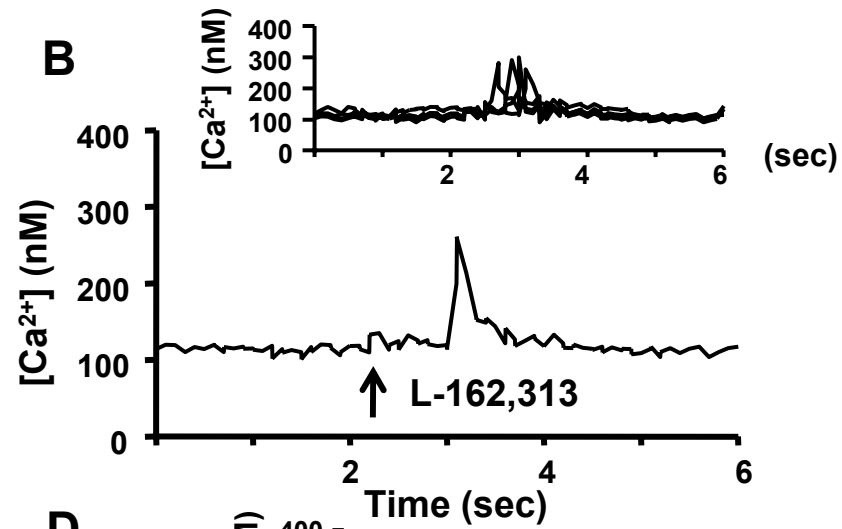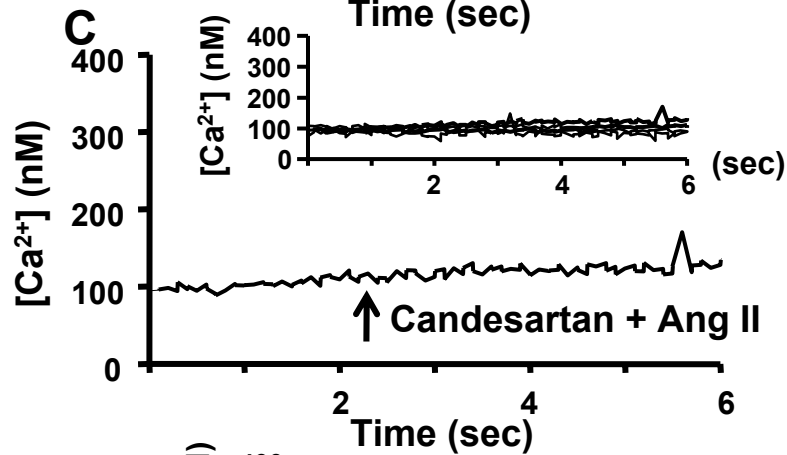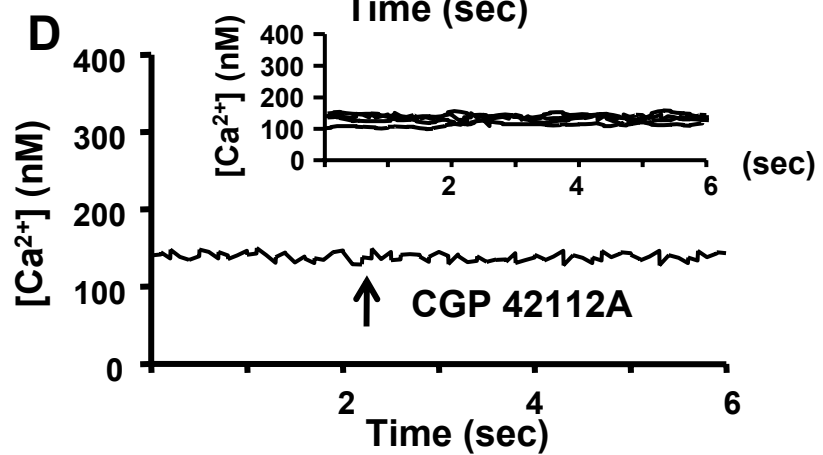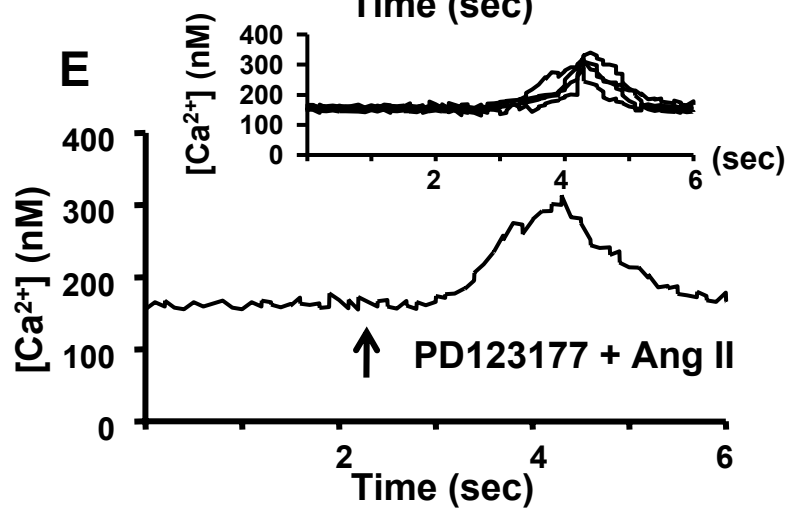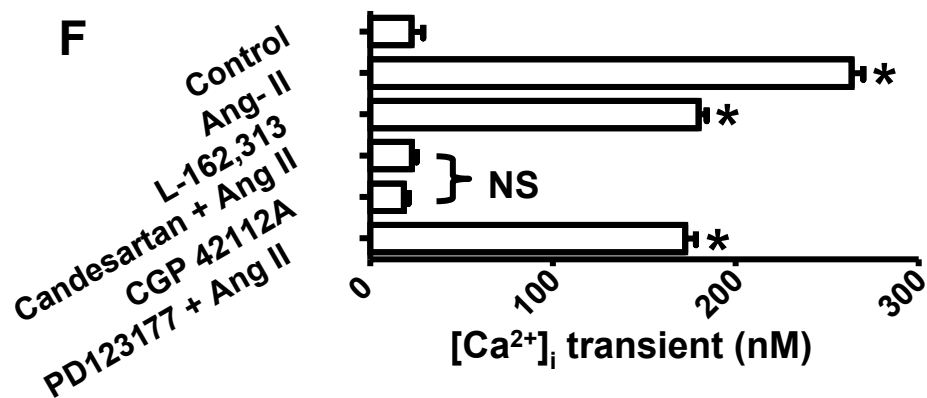

On-line Figure 7

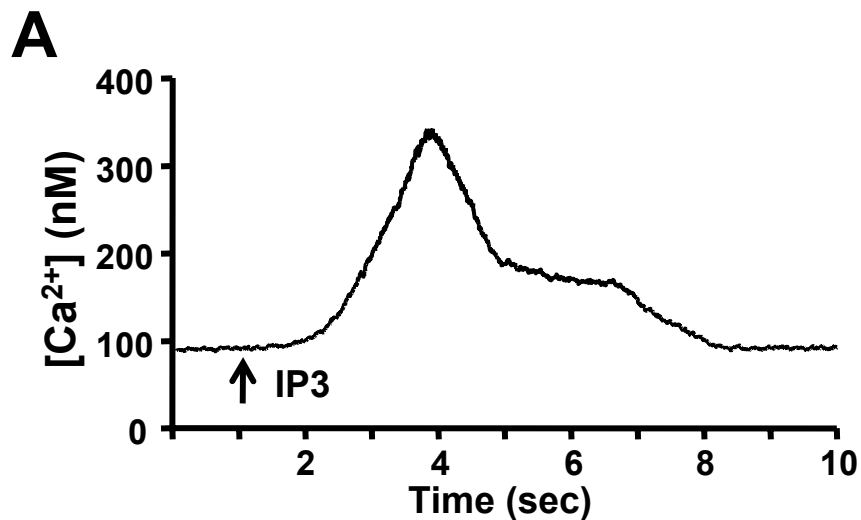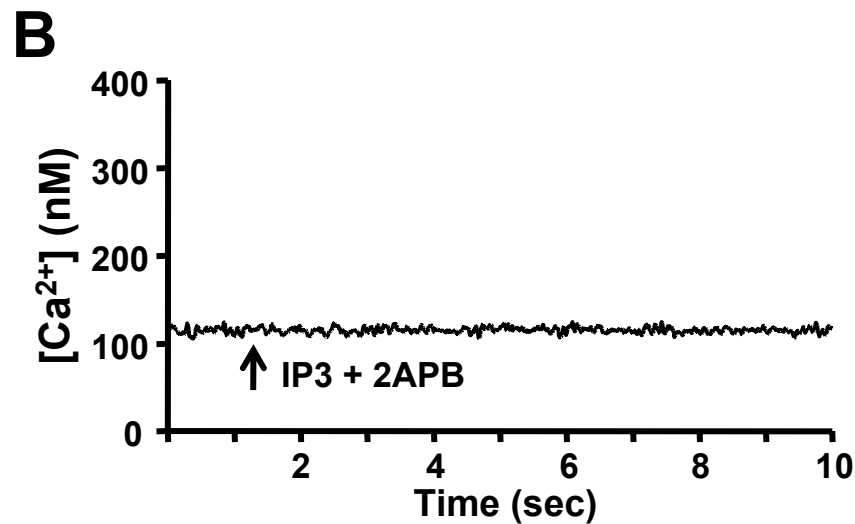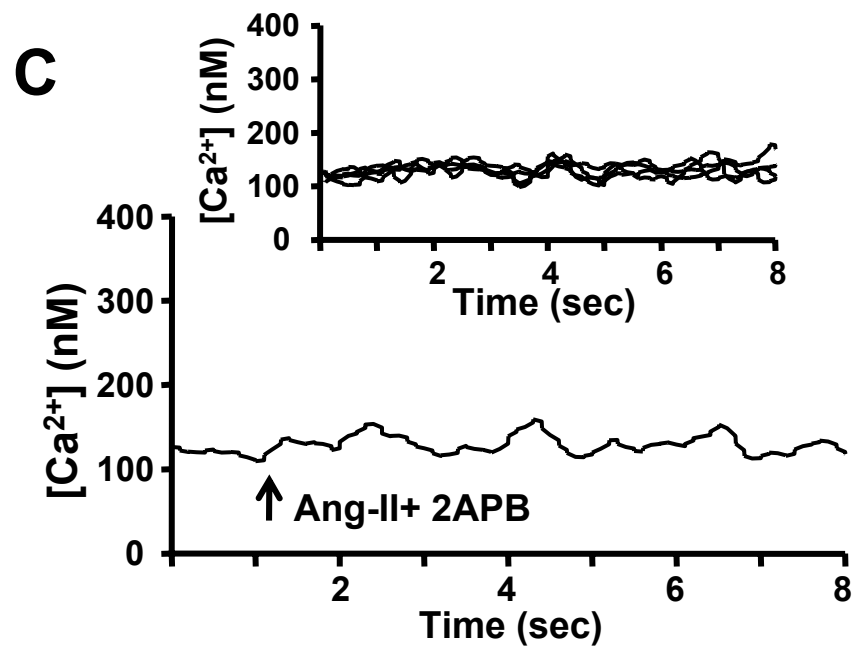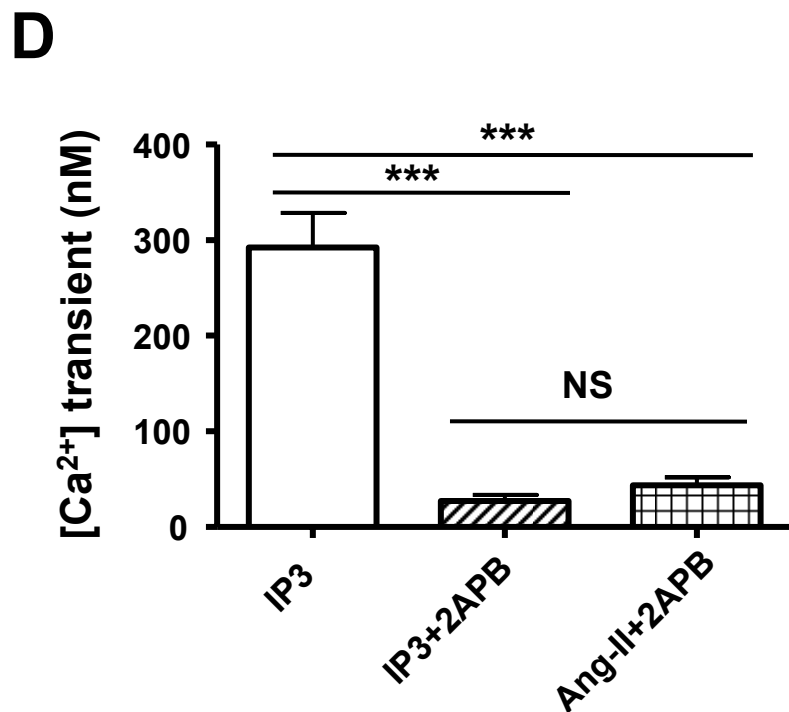

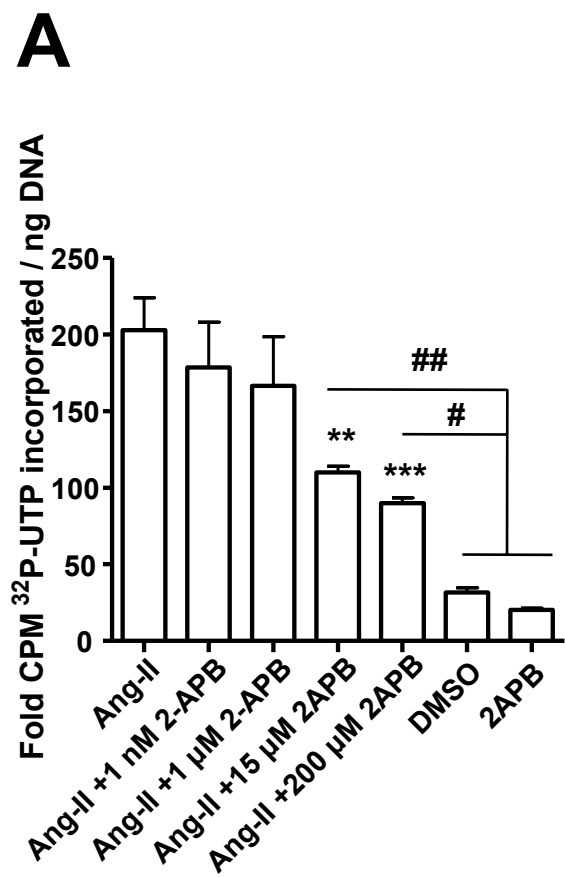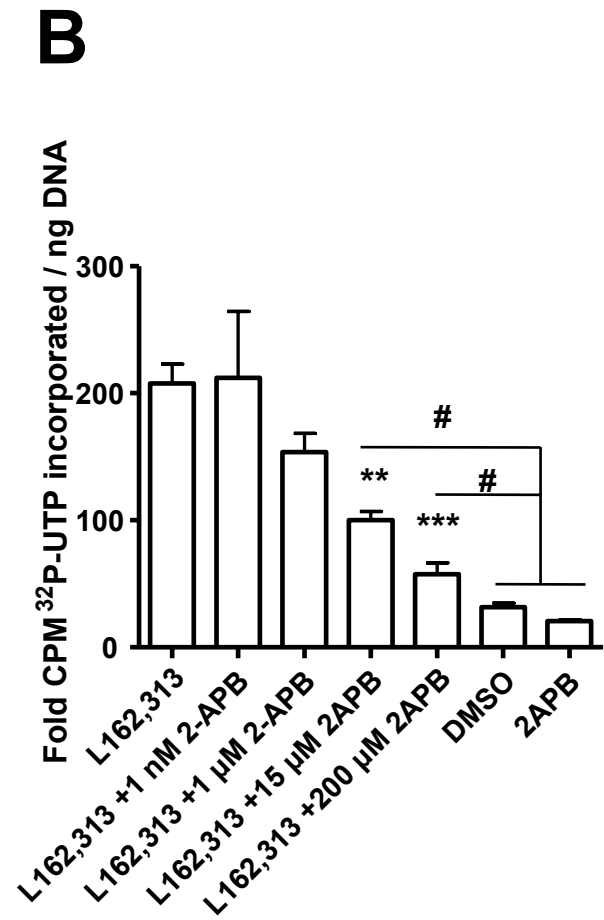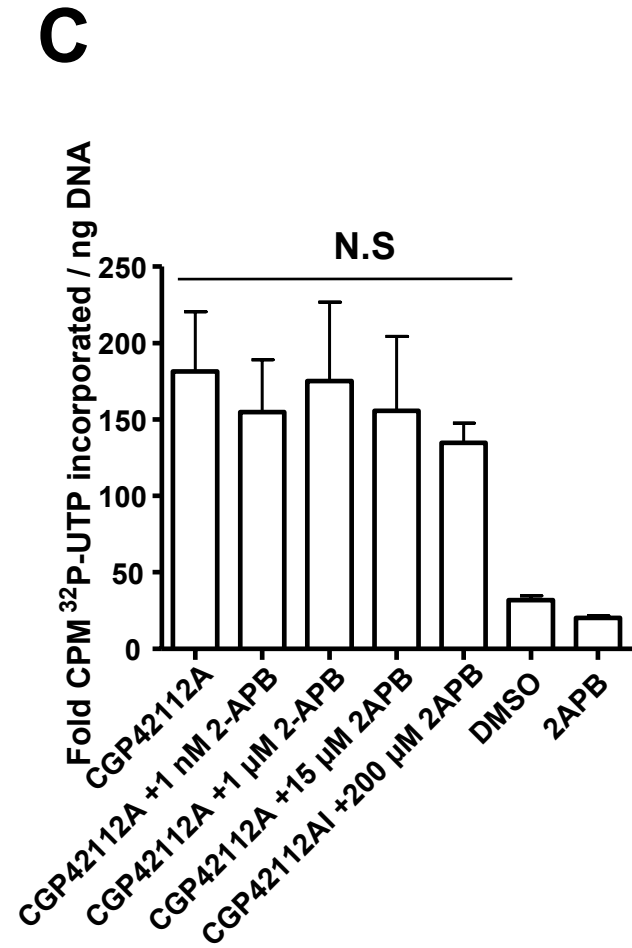

## On-Line Methods

*Isolation of heart nuclei.* Nuclear isolation was performed according to a modified version of a previously-described method (13). Briefly, rat hearts were manually ground into a powder under liquid nitrogen, resuspended in cold phosphate-buffered saline (PBS) (137 mM NaCl, 10 mM phosphate, 2.7 mM KCl with a final pH of 7.4, NaOH) and homogenized with a Polytron. The total extract was labelled Fraction A. The subsequent steps were carried out on ice or in a cooling cabinet at 4°C. Homogenates were centrifuged at 1400×g for 15 min and the supernatant, denoted Fraction B, was diluted 1:1 with buffer A (10 mM K-HEPES, 1.5 mM MgCl<sub>2</sub>, 10 mM KCl, 1 mM DTT, 25 µg/ml leupeptin, 0.2 mM Na<sub>3</sub>VO<sub>4</sub> with a final pH of 7.4, NaOH), incubated for 10 min on ice and re-centrifuged at a higher speed (3500×g) for 15 min. The resulting supernatant was discarded and the pellet, containing crude nuclei (designated Fraction C) was resuspended in buffer B (0.3 M K-HEPES, 1.5 M KCl, 0.03 M MgCl<sub>2</sub>, 25 µg/ml leupeptin, 0.2 mM Na<sub>3</sub>VO<sub>4</sub> with a final pH of 7.4, NaOH), incubated on ice for 10 min, and centrifuged for 30 min at 5000×g. The pellet, comprising a nuclear-enriched fraction (designated Fraction D), was resuspended in buffer C (20 mM Na-HEPES, 25% (volume/volume) glycerol, 0.42 M NaCl, 1.5 mM MgCl<sub>2</sub>, 0.2 mM EDTA, 0.2 mM EGTA, 0.5 mM phenylmethylsulfonyl fluoride, 0.5 mM DTT, 25 µg/ml leupeptin, 0.2 mM Na<sub>3</sub>VO<sub>4</sub> with a final pH of 7.4, NaOH) or 1× transcription buffer (see below) and either used freshly or aliquoted, snap-frozen with liquid nitrogen, and stored at -80°C. Protein concentrations were determined by Bradford assay using a NanoDrop ND-1000 Spectrophotometer (Wilmington, DE).

1. Xiao, L., Coutu, P., Villeneuve, L.R., Tadevosyan, A., Maguy, A., Le Bouter, S., Allen, B.G., and Nattel, S. (2008) *Circ Res* **103**(7), 733-742

## On-line Table I

### Primary Antibody Information

| <i>Protein</i>       | <i>Isotype</i>    | <i>Company</i> | <i>Catalogue Number</i> | <i>Dilution</i> |
|----------------------|-------------------|----------------|-------------------------|-----------------|
| AT1 (43kDa)          | Rabbit-polyclonal | Alomone labs   | ZZR-011-AN01            | 1:400           |
| AT1-c18              | Goat-polyclonal   | Santa Cruz     | Sc-31181                | 1:500           |
| AT2(47kDa)           | Rabbit-polyclonal | Alomone labs   | AAR-012-AN01            | 1:400           |
| AT2-c18              | Goat-polyclonal   | Santa Cruz     | Sc-7420                 | 1:500           |
| Calpactin-I (36kDa)  | Mouse-monoclonal  | BD Biosciences | 610068                  | 1:2000          |
| DDR2 (98kDa)         | Rabbit-polyclonal | Abcam          | Ab5520                  | 1:200           |
| GM-130 (130kDa)      | Mouse-monoclonal  | BD Biosciences | 610823                  | 1:250           |
| GRP78 (75kDa)        | Rabbit-polyclonal | Abcam          | Ab21685                 | 1:1000          |
| Histone 3 (17kDa)    | Rabbit-polyclonal | Cell Signaling | #9715                   | 1:1000          |
| MyHC (223kDa)        | Mouse-monoclonal  | Abcam          | Ab15                    | 1:1000          |
| NSE (47kDa)          | Rabbit-polyclonal | Abcam          | Ab16873                 | 1:2000          |
| Nup-62 (62kDa)       | Mouse-monoclonal  | BD Biosciences | 610498                  | 1:1000          |
| VWF (130, 190kDa)    | Goat-polyclonal   | Santa Cruz     | Sc-8068                 | 1:100           |
| $\alpha$ SMA (42kDa) | Mouse-monoclonal  | Sigma          | A5228                   | 1:2000          |

### Secondary Antibody Information

| <i>Antibody Description</i> | <i>Company</i> | <i>Catalogue Number</i> | <i>Dilution</i> |
|-----------------------------|----------------|-------------------------|-----------------|
| Donkey anti-rabbit IgG      | Jackson        | 711-005-152             | 1:10000         |
| Donkey anti-mouse IgG       | Jackson        | 711-005-150             | 1:15000         |
| Donkey anti-goat IgG        | Jackson        | 711-005-003             | 1:10000         |



## On-line Table II

### Primers Information

| <i>Primers</i> | <i>Description</i>                                                   | <i>Sequences</i>                                                        | <i>RefSeq mRNA</i> |
|----------------|----------------------------------------------------------------------|-------------------------------------------------------------------------|--------------------|
| Ace            | Angiotensin-converting enzyme                                        | F: CCTGATCAACCAGGAGTTTGCAGAG<br>R: GCCAGCCTTCCCAGGCAAACAGCAC            | NM_012544.1        |
| Agt            | Angiotensinogen                                                      | F: GACCGCGTATACATCCACCCCTTTCATCTC<br>R: GTCCACCCAGAACTCATGGAGCCCAGTCAG  | NM_134432.2        |
| B2m            | Beta-2 microglobulin                                                 | F: GAATTCAGTGTGAGCCAGGATG<br>R: CAAGTGTACTCTCGCCATCCAC                  | NM_012512.1        |
| Cts            | Cathepsin                                                            | F: GGGGGAAATCTACAAAAATG<br>R: AAAGACTCCTATCTGCCTCACT                    | NM_022597.2        |
| GAPDH          | Glyceraldehyde-3-phosphate dehydrogenase                             | F: TACATGTTCCAGTATGACTC<br>R: TGTGAGGGAGATGCTCAGTG                      | NM_017008          |
| Hspcb          | Heat shock protein 90kDa alpha, class B member 1                     | F: TGTTTCTTCACCACCTCCTTGA<br>R: CCTACCTGGTGGCAGAGAAAGT                  | NM_001004082       |
| NFκB1          | Nuclear factor of kappa light polypeptide gene enhancer in B-cells 1 | F: CTGCGATACCTTAATGACAGCG<br>R: AATTTGGCTTCCTTTCTTGGCT                  | XM_342346.3        |
| Ren            | Renin                                                                | F: CTGGGAGGCAGTGACCCTCAACATTACCAG<br>R: GAGAGCCAGTATGCACAGGTCATCGTI'CCT | NM_012642.4        |
